# Supplementary material for: Existing joint erosions increase the risk of joint space narrowing independently of clinical synovitis in patients with early rheumatoid arthritis
Source: Springer Nature journal article supplement (doi:10.1186/s13075-015-0626-1), 2015-05-20
Supplement: MOESM1 [file 9783686]

**List of Investigators and Corresponding IEC/IRB**

|  | <b>Site Name/Post Office Address</b>                                                                                                                                                 | <b>Name and Address of IEC/IRB</b>                                                                                                |  |
|--|--------------------------------------------------------------------------------------------------------------------------------------------------------------------------------------|-----------------------------------------------------------------------------------------------------------------------------------|--|
|  | Azienda Ospedaliera Universitaria Integrata Verona<br>Policlinico G.B. Rossi, Istituto di Patologia Speciale Medica Cattedra di Reumatologia P. le L.A. Scuro, 10 Verona 37134 Italy | Comitato Etico per la sperimentazione dell'Azienda Ospedaliera Universitaria Integrata Verona -P.le Stefani, 1 37126 Verona Italy |  |
|  | The Center for Rheumatology and Bone Research 2730 University Boulevard West Suite 306 Wheaton, MD 20902 United States                                                               | Western International Review Board<br>3535 Seventh Avenue SW Olympia, WA 98502 United States                                      |  |
|  | Portland Rheumatology Clinic, LLC<br>17050 Pilkington Road, Suite 130<br>Lake Oswego, OR 97035 United States                                                                         | Western International Review Board<br>3535 Seventh Avenue SW<br>Olympia, WA 98502 United States                                   |  |

| <b>List of Investigators and Corresponding IEC/IRB</b> |                                                                                                                                                                                               |                                                                                                                                                                    |  |
|--------------------------------------------------------|-----------------------------------------------------------------------------------------------------------------------------------------------------------------------------------------------|--------------------------------------------------------------------------------------------------------------------------------------------------------------------|--|
|                                                        | <b>Site Name/Post Office Address</b>                                                                                                                                                          | <b>Name and Address of IEC/IRB</b>                                                                                                                                 |  |
|                                                        | Sunnybrook Health Sciences Centre<br>2075 Bayview Avenue Room<br>M1-430 Toronto, ON M4N 3M5<br>Canada                                                                                         | Sunnybrook Health Sciences Centre<br>Research Ethics Board D8-59, 2075 Bayview<br>Avenue Toronto, ON M4N 3M5 Canada                                                |  |
|                                                        | 203-25 Charlton Ave East Hamilton,<br>ON L8N 1Y2 Canada                                                                                                                                       | Institutional Review Board Services 372<br>Hollandview Trail, Suite 300 Aurora, ON<br>L4G 0A5 Canada                                                               |  |
|                                                        | Azienda Ospedaliera Universitaria<br>Integrata Verona Policlinico G.B.<br>Rossi, Istituto di Patologia Speciale<br>Medica Cattedra di Reumatologia P.<br>le L.A. Scuro, 10 Verona 37134 Italy | Comitato Etico per la sperimentazione<br>clinica dei medicinali dell'Azienda<br>Ospedaliera Universitaria Integrata Verona -<br>P.le Stefani, 1 37126 Verona Italy |  |
|                                                        | Clinical Pharmacology Study Group<br>25 Oak Avenue Worchester, MA<br>01605-0000 United States                                                                                                 | Western International Review Board 3535<br>Seventh Avenue SW Olympia, WA 98502<br>United States                                                                    |  |

| <b>List of Investigators and Corresponding IEC/IRB</b> |                                                                                                                                                                                     |                                                                                                                                                                                        |  |
|--------------------------------------------------------|-------------------------------------------------------------------------------------------------------------------------------------------------------------------------------------|----------------------------------------------------------------------------------------------------------------------------------------------------------------------------------------|--|
|                                                        | <b>Site Name/Post Office Address</b>                                                                                                                                                | <b>Name and Address of IEC/IRB</b>                                                                                                                                                     |  |
|                                                        | Department of Rheumatology St.<br>George Hospital Gray Street<br>Kogarah, NSW 2217 Australia                                                                                        | South Eastern Sydney and Illawarra Health<br>Human Research Ethics Committee St.<br>George Hospital Gray Street Kogarah NSW<br>2217 Australia                                          |  |
|                                                        | Rheumatology Department<br>Level 4, QEII Building Institute of<br>Rheumatology & Orthopaedics<br>Royal Prince Albert Hospital 59<br>Missenden Road Camperdown NSW<br>2050 Australia | Sydney Local Health District Ethics Review<br>Committee (RPAH Zone) Royal Prince<br>Alfred Hospital c/o Research Development<br>Office Missenden Road Camperdown NSW<br>2050 Australia |  |

| <b>List of Investigators and Corresponding IEC/IRB</b> |                                                                                                                          |                                                                                                                                           |  |
|--------------------------------------------------------|--------------------------------------------------------------------------------------------------------------------------|-------------------------------------------------------------------------------------------------------------------------------------------|--|
|                                                        | <b>Site Name/Post Office Address</b>                                                                                     | <b>Name and Address of IEC/IRB</b>                                                                                                        |  |
|                                                        | Department of Rheumatology,<br>Medical Centre Frederiksberg<br>Hospital Nordre Fasanvej 57 2000<br>Frederiksberg Denmark | Den Videnskabetiske Komité for<br>Ringkjöbing, Ribe and Sønderjyllands<br>Community Central Hospital Östergade 80<br>6700 Esbjerg Denmark |  |
|                                                        | Hopital Avicenne<br>Service de Rhumatologie 125, Rue<br>de Stalingrad Bobigny 93009 France                               | CCPPRB de Paris St Louis –<br>Hopital de St Louis 1 Avenue Claude<br>Vellefaux Paris 75475 France                                         |  |
|                                                        | 8263 Grove Avenue, Suite 100<br>Rancho Cucamonga, CA 91730<br>United States                                              | Western International Review Board<br>3535 Seventh Avenue SW<br>Olympia, WA 98502 United States                                           |  |

| <b>List of Investigators and Corresponding IEC/IRB</b> |                                                                                                                    |                                                                                                                                                         |  |
|--------------------------------------------------------|--------------------------------------------------------------------------------------------------------------------|---------------------------------------------------------------------------------------------------------------------------------------------------------|--|
|                                                        | <b>Site Name/Post Office Address</b>                                                                               | <b>Name and Address of IEC/IRB</b>                                                                                                                      |  |
|                                                        | Fakultni Nemocnice Hradec Kralove<br>II interni klinika<br>Sokolska 581<br>Hradec Kralove 500 05<br>Czech Republic | Fakultni Nemocnice Hradec Kralove<br>Eticka Komise<br>Sokolska 581<br>Hradec Kralove 50005<br>Czech Republic                                            |  |
|                                                        | Karolinska University Hospital –<br>Huddinge Department of<br>Rheumatology Stockholm SE-141 86<br>Sweden           | Regionala etikprovningnamnden i<br>Stockholm FE 289 (mail address) Karolinska<br>Institutet Nobels vag 12A (visitors address)<br>Stockholm 17177 Sweden |  |

| <b>List of Investigators and Corresponding IEC/IRB</b> |                                                                                                                 |                                                                                      |  |
|--------------------------------------------------------|-----------------------------------------------------------------------------------------------------------------|--------------------------------------------------------------------------------------|--|
|                                                        | <b>Site Name/Post Office Address</b>                                                                            | <b>Name and Address of IEC/IRB</b>                                                   |  |
|                                                        | Leiden University Medical Center<br>Department of Rheumatology<br>Albinusdreef 2 Leiden 2333 ZA The Netherlands | CWOM Academic Hospital Nijmegen<br>Gerard van Swietenlaan 2 Nijmegen The Netherlands |  |

| <b>List of Investigators and Corresponding IEC/IRB</b> |                                                                                                                   |                                                                                                                   |  |
|--------------------------------------------------------|-------------------------------------------------------------------------------------------------------------------|-------------------------------------------------------------------------------------------------------------------|--|
|                                                        | <b>Site Name/Post Office Address</b>                                                                              | <b>Name and Address of IEC/IRB</b>                                                                                |  |
|                                                        | St. Vincent's University Hospital<br>Department of Rheumatology The Bone and Joint Unit Elm Park Dublin 4 Ireland | Clinical Research Ethics Comm. of the Cork Teaching Hospitals Lancaster Hall 6 Little Hanover Street Cork Ireland |  |

| <b>List of Investigators and Corresponding IEC/IRB</b> |                                                                                                                      |                                                                                                                                                                                                                                                                                                                                                    |  |
|--------------------------------------------------------|----------------------------------------------------------------------------------------------------------------------|----------------------------------------------------------------------------------------------------------------------------------------------------------------------------------------------------------------------------------------------------------------------------------------------------------------------------------------------------|--|
|                                                        | <b>Site Name/Post Office Address</b>                                                                                 | <b>Name and Address of IEC/IRB</b>                                                                                                                                                                                                                                                                                                                 |  |
|                                                        | Universitair Medisch Centrum<br>Groningen<br>Afdeling Reumatologie Hanzeplein 1<br>Groningen 9713 GZ The Netherlands | Local: Commissie Mensgebonden Onderzoek (CMO)<br>Regio Arnhem-Nijmegen Radboud<br>Universitair Medisch Centrum P.O. Box 9101 Geert Grooteplein 10 Nijmegen 6500 HB The Netherlands<br>Central: Commissie Mensgebonden Onderzoek (CMO) Regio Arnhem-Nijmegen p/a UMC St. Radboud Huispost 531 Geert Grooteplein 10 Nijmegen 6525 GA The Netherlands |  |

| <b>List of Investigators and Corresponding IEC/IRB</b> |                                                                                                                                                  |                                                                                                                                                                                                                                                                                                                                      |  |
|--------------------------------------------------------|--------------------------------------------------------------------------------------------------------------------------------------------------|--------------------------------------------------------------------------------------------------------------------------------------------------------------------------------------------------------------------------------------------------------------------------------------------------------------------------------------|--|
|                                                        | <b>Site Name/Post Office Address</b>                                                                                                             | <b>Name and Address of IEC/IRB</b>                                                                                                                                                                                                                                                                                                   |  |
|                                                        | Austin and Repatriation Medical<br>Centre Repatriation Campus<br>Rheumatology Department Banksia<br>Street West Heidelberg VIC 3081<br>Australia | Austin Hospital<br>Human Research Ethics Committee Research<br>Ethics Unit, Level 8, HSB - Room 8322 145<br>Studley Road Heidelberg VIC 3084 Australia                                                                                                                                                                               |  |
|                                                        | Charite Universitaetsmedizin<br>Campus Virchow Klinikum<br>Rheumatologie und Klinische<br>Immunologie Chariteplatz 1 Berlin<br>10117 Germany     | Local: Charite Universitaetsmedizin<br>Campus Virchow Klinikum<br>Ethikkommission Schumannstr. 20/21 Berlin<br>10117 Germany Central: Universitaet<br>Erlangen-Nuernberg Ethik-Kommission der<br>Medizinischen Fakultaeet der<br>Friedrich-Alexander-Universitaet<br>Erlangen/Nuernberg Krankenhausstr. 12<br>Erlangen 91054 Germany |  |

| <b>List of Investigators and Corresponding IEC/IRB</b> |                                                                                                |                                                                                                 |  |
|--------------------------------------------------------|------------------------------------------------------------------------------------------------|-------------------------------------------------------------------------------------------------|--|
|                                                        | <b>Site Name/Post Office Address</b>                                                           | <b>Name and Address of IEC/IRB</b>                                                              |  |
|                                                        | Tampa Medical Group, PA 4700<br>North Habana Avenue Suite 303<br>Tampa, FL 33614 United States | Western International Review Board 3535<br>Seventh Avenue SW Olympia, WA 98502<br>United States |  |

| <b>List of Investigators and Corresponding IEC/IRB</b> |                                                                                                                                                     |                                                                                                                          |  |
|--------------------------------------------------------|-----------------------------------------------------------------------------------------------------------------------------------------------------|--------------------------------------------------------------------------------------------------------------------------|--|
|                                                        | <b>Site Name/Post Office Address</b>                                                                                                                | <b>Name and Address of IEC/IRB</b>                                                                                       |  |
|                                                        | Radiant Research, Gainesville<br>Gainesville Clinical Research Center<br>1014 NW 57th Street, Suite A, C & D<br>Gainesville, FL 32605 United States | Western International Review Board<br>3535 Seventh Avenue SW<br>Olympia, WA 98502 United States                          |  |
|                                                        | Hospital Univ Clinic i Provincial<br>Servicio de Reumatologia 2 Piso,<br>Escalera 11, Despacho 13 C/<br>Villarroel 170 Barcelona 08036<br>Spain     | Hospital Univ Clinic i Provincial<br>Comite Etico de Investigacion clinica C/<br>Villarroel, 170 Barcelona 08036 Spain   |  |
|                                                        | Arthritis Centre<br>800 Sherbrook Street, RR149<br>Winnipeg, MB R3A 1M4<br>Canada                                                                   | University of Manitoba<br>Biomedical Research Ethics Board<br>A112-753 McDermot Avenue<br>Winnipeg, MB R3E 0W3<br>Canada |  |

| <b>List of Investigators and Corresponding IEC/IRB</b> |                                                                     |                                                                                                              |  |
|--------------------------------------------------------|---------------------------------------------------------------------|--------------------------------------------------------------------------------------------------------------|--|
|                                                        | <b>Site Name/Post Office Address</b>                                | <b>Name and Address of IEC/IRB</b>                                                                           |  |
|                                                        | Hospital Gregorio Maranon Doctor<br>Esquerdo, 46 28007 Madrid Spain | Comite Etico de Investigacion clinica<br>Hospital Gregorio Maranon Doctor<br>Esquerdo, 46 28007 Madrid Spain |  |

| <b>List of Investigators and Corresponding IEC/IRB</b> |                                                                                                                                                    |                                                                                                   |  |
|--------------------------------------------------------|----------------------------------------------------------------------------------------------------------------------------------------------------|---------------------------------------------------------------------------------------------------|--|
|                                                        | <b>Site Name/Post Office Address</b>                                                                                                               | <b>Name and Address of IEC/IRB</b>                                                                |  |
|                                                        | Centre Hospitalier Universitaire<br>Vaudois<br>Service de Rhumatologie Hopital<br>Orthopedique 4 Avenue Pierre<br>Decker Lausanne 1011 Switzerland | Commission d'Ethique de la Recherche<br>Clinique<br>21 rue du Bugnon Lausanne 1005<br>Switzerland |  |
|                                                        | 1301 West 38th Street<br>Suite 609 Austin, TX 78705 United<br>States                                                                               | Western International Review Board<br>3535 Seventh Avenue SW Olympia, WA<br>98502 United States   |  |
|                                                        | Arthritis Center of Nebraska 3901<br>Pine Lake Road, Suite 120<br>Lincoln,NE 68516 United States                                                   | Western International Review Board 3535<br>Seventh Avenue SW Olympia, WA 98502<br>United States   |  |

| <b>List of Investigators and Corresponding IEC/IRB</b> |                                                                                                          |                                                                                                      |  |
|--------------------------------------------------------|----------------------------------------------------------------------------------------------------------|------------------------------------------------------------------------------------------------------|--|
|                                                        | <b>Site Name/Post Office Address</b>                                                                     | <b>Name and Address of IEC/IRB</b>                                                                   |  |
|                                                        | 187 Hughson Street South<br>Hamilton, ON L8N 2B6 Canada                                                  | Institutional Review Board Services<br>372 Hollandview Trail, Suite 300 Aurora,<br>ON L4G 0A5 Canada |  |
|                                                        | Metroplex Clinical Research Center<br>8144 Walnut Hill Lane, Suite 810<br>Dallas, TX 75231 United States | Western International Review Board 3535<br>Seventh Avenue SW Olympia, WA 98502<br>United States      |  |

| <b>List of Investigators and Corresponding IEC/IRB</b> |                                                                                                                                      |                                                                                                                                              |  |
|--------------------------------------------------------|--------------------------------------------------------------------------------------------------------------------------------------|----------------------------------------------------------------------------------------------------------------------------------------------|--|
|                                                        | <b>Site Name/Post Office Address</b>                                                                                                 | <b>Name and Address of IEC/IRB</b>                                                                                                           |  |
|                                                        | Hopital Lapeyronie<br>Service d' Immuno - Rhumatologie<br>371, Avenue du Douen Gaston<br>Giraud 34295 Montpellier Cedex 5<br>France  | CCPPRB de Paris St Louis - Hopital St<br>Louis<br>Porte 5 du Carre historique – 1, avenue<br>Claude Vellefaux 75475 Paris Cedex 10<br>France |  |
|                                                        | Università di Genova<br>Divisione de Reumatologia<br>Dipartimento de Medicina Interna<br>Viale Benedetto XV, 6 16132<br>Genova Italy | Comitato Etico del DIMI<br>Università degli Studi di Genova Viale<br>Benedetto XV, 6 16132 Genova Italy                                      |  |
|                                                        | Hjørring Hospital<br>Department of Rheumatology<br>Bispensgade 37 9800 Hjørring<br>Denmark                                           | Ethics committee for Ringkjøbing, Ribe and<br>Sønderjylland The Secretariat Central<br>hospital Østergade 80 DK 6700 Esbjerg<br>Denmark      |  |

| <b>List of Investigators and Corresponding IEC/IRB</b> |                                                                                                                                                        |                                                                                                                                                                |  |
|--------------------------------------------------------|--------------------------------------------------------------------------------------------------------------------------------------------------------|----------------------------------------------------------------------------------------------------------------------------------------------------------------|--|
|                                                        | <b>Site Name/Post Office Address</b>                                                                                                                   | <b>Name and Address of IEC/IRB</b>                                                                                                                             |  |
|                                                        | Clinical Pharmacology and<br>Toxicology Department Therapeutics<br>Centre St. Vincent's Hospital<br>Victoria Street Darlinghurst NSW<br>2010 Australia | St. Vincent's Hospital Research Ethics<br>Committee Level 6, de Lacy Building St.<br>Vincent's Hospital 390 Victoria Street<br>Darlinghurst NSW 2010 Australia |  |



| <b>List of Investigators and Corresponding IEC/IRB</b> |                                                                                                                                                                               |                                                                                                                                    |  |
|--------------------------------------------------------|-------------------------------------------------------------------------------------------------------------------------------------------------------------------------------|------------------------------------------------------------------------------------------------------------------------------------|--|
|                                                        | <b>Site Name/Post Office Address</b>                                                                                                                                          | <b>Name and Address of IEC/IRB</b>                                                                                                 |  |
|                                                        | AO Universita Santa Maria della Misericordia di Udine<br>Clinica Medica Cattedra di Reumatologia Policlinico Universitario Piazza S. Maria Misericordia, 13 Udine 33100 Italy | Comitato Etico Aziendale dell'Azienda Ospedaliero Universitaria "Santa Maria della Misericordia" Via Colugna, 50 Udine 33100 Italy |  |

| <b>List of Investigators and Corresponding IEC/IRB</b> |                                                                                                                |                                                                                                                                                                                 |  |
|--------------------------------------------------------|----------------------------------------------------------------------------------------------------------------|---------------------------------------------------------------------------------------------------------------------------------------------------------------------------------|--|
|                                                        | <b>Site Name/Post Office Address</b>                                                                           | <b>Name and Address of IEC/IRB</b>                                                                                                                                              |  |
|                                                        | Cliniques Universitaires Saint Luc<br>Department de Rhumatologie<br>Avenue Hippocrate 10 Brussels 1200 Belgium | Comission d'Ethique Biomédical Hospitaux Facultaire Clinique Universitaire UCL<br>Professeur Dr. Maloteaux Tour Harvey, UCL<br>5514 Avenue Hippocrate 10 1200 Bruxelles Belgium |  |
|                                                        | Rockford Health Physicians 2300 N. Rockton Avenue Rockford, IL 61103 United States                             | Western International Review Board 3535 Seventh Avenue SW Olympia, WA 98502 United States                                                                                       |  |
|                                                        | Coastal Clinical Research, Inc. 6701 Airport Blvd., Suite C-132 Mobile, AL 36608 United States                 | Western International Review Board 3535 Seventh Avenue SW Olympia, WA 98502 United States                                                                                       |  |

| <b>List of Investigators and Corresponding IEC/IRB</b> |                                                                                                                                                          |                                                                                                               |  |
|--------------------------------------------------------|----------------------------------------------------------------------------------------------------------------------------------------------------------|---------------------------------------------------------------------------------------------------------------|--|
|                                                        | <b>Site Name/Post Office Address</b>                                                                                                                     | <b>Name and Address of IEC/IRB</b>                                                                            |  |
|                                                        | Rheumatologische Einheit der Ludwig-Maximilians-Universitaet Medizinische Poliklinik Pettenkoflerstrasse 8a 80336 Muenchen Germany                       | Bayerische Landesaezrtekammer Muehlbaaurstr. 16 81677 Muenchen Germany                                        |  |
|                                                        | Groupe Hospitalier Cochin Service de Rhumatologie B Groupement universitaire hospitalier Ouest 27 rue du Faubourg St Jacques 75679 Paris Cedex 14 France | CCP Ile de France IV de Saint Louis Hopital Saint Louis 1 Avenue Claude Vellefaux Paris 75475 Cedex 10 France |  |

| <b>List of Investigators and Corresponding IEC/IRB</b> |                                                                                                                                        |                                                                                                              |  |
|--------------------------------------------------------|----------------------------------------------------------------------------------------------------------------------------------------|--------------------------------------------------------------------------------------------------------------|--|
|                                                        | <b>Site Name/Post Office Address</b>                                                                                                   | <b>Name and Address of IEC/IRB</b>                                                                           |  |
|                                                        | Centre Hospitalier Universitaire Vaudois Service de Rhumatologie Hopital Orthopedique 4 Avenue Pierre Decker Lausanne 1011 Switzerland | Commission d'Ethique de la Recherche Clinique 21 rue du Bugnon Lausanne 1005 Switzerland                     |  |
|                                                        | Rheumatology Northwest PLLC and Clinical Trials Northwest 3902 Creekside Loop, Suite 120 Yakima, WA 98902 United States                | Western International Review Board 3535 Seventh Avenue SW Olympia, WA 98502 United States                    |  |
|                                                        | Arthritis Centre 800 Sherbooke Street, RR149 Winnkpeg, MB R3A 1M4 Canada                                                               | University of Manitoba Biomedical Research Ethics Board A112-753 McDermot Avenue Winnipeg, MB R3E 0W3 Canada |  |

| <b>List of Investigators and Corresponding IEC/IRB</b> |                                                                                                    |                                                                                                                                                                                                       |  |
|--------------------------------------------------------|----------------------------------------------------------------------------------------------------|-------------------------------------------------------------------------------------------------------------------------------------------------------------------------------------------------------|--|
|                                                        | <b>Site Name/Post Office Address</b>                                                               | <b>Name and Address of IEC/IRB</b>                                                                                                                                                                    |  |
|                                                        | Rheumatology Research & Rehabilitation Unit University of Leeds 36 Clarendon Road Leeds LS1 3EX UK | Local Research Ethics Committee 6th Floor Wellcome Wing The General Infirmary at Leeds Leeds, LS1 3EX UK Northern and Yorkshire MREC John Snow House Durham University Science Park Durham DH1 3YG UK |  |

| <b>List of Investigators and Corresponding IEC/IRB</b> |                                                                      |                                                                                                                                                                                                                                                                                                                 |  |
|--------------------------------------------------------|----------------------------------------------------------------------|-----------------------------------------------------------------------------------------------------------------------------------------------------------------------------------------------------------------------------------------------------------------------------------------------------------------|--|
|                                                        | <b>Site Name/Post Office Address</b>                                 | <b>Name and Address of IEC/IRB</b>                                                                                                                                                                                                                                                                              |  |
|                                                        | Zentrum fuer Therapiestudien Deutscher Platz 5 Leipzig 04103 Germany | Local: Ethik - Kommission an der Medizinischen Fakultät der Universität Leipzig Haertelstrasse 16-18 Leipzig 04107 Germany Central: Universität Erlangen-Nuernberg Ethik-Kommission der Medizinischen Fakultät der Friedrich-Alexander-Universität Erlangen/Nuernberg Krankenhausstr. 12 Erlangen 91054 Germany |  |
|                                                        | 1901 S. Cedar #201 Tacoma, WA 98405 United States                    | Western International Review Board 3535 Seventh Avenue SW Olympia, WA 98502 United States                                                                                                                                                                                                                       |  |

| <b>List of Investigators and Corresponding IEC/IRB</b> |                                                                                                                            |                                                                                                            |  |
|--------------------------------------------------------|----------------------------------------------------------------------------------------------------------------------------|------------------------------------------------------------------------------------------------------------|--|
|                                                        | <b>Site Name/Post Office Address</b>                                                                                       | <b>Name and Address of IEC/IRB</b>                                                                         |  |
|                                                        | Clinica Medica Cattedra di<br>Reumatologia Policlino Universitario<br>Piazza S. Maria Misericordia, 1<br>Udine 33100 Italy | Comitato Etico Indipendente del Policlinico<br>Universitario di Udine Via Colugna, 50<br>33100 Udine Italy |  |

| <b>List of Investigators and Corresponding IEC/IRB</b> |                                                                                                                         |                                                                                                                            |  |
|--------------------------------------------------------|-------------------------------------------------------------------------------------------------------------------------|----------------------------------------------------------------------------------------------------------------------------|--|
|                                                        | <b>Site Name/Post Office Address</b>                                                                                    | <b>Name and Address of IEC/IRB</b>                                                                                         |  |
|                                                        | St. Vincent's University Hospital<br>Department of Rheumatology<br>The Bone and Joint Unit Elm Park<br>Dublin 4 Ireland | Clinical Research Ethics Comm. of the Cork<br>Teaching Hospitals<br>Lancaster Hall 6 Little Hanover Street Cork<br>Ireland |  |

| <b>List of Investigators and Corresponding IEC/IRB</b> |                                                                                           |                                                                                                                        |  |
|--------------------------------------------------------|-------------------------------------------------------------------------------------------|------------------------------------------------------------------------------------------------------------------------|--|
|                                                        | <b>Site Name/Post Office Address</b>                                                      | <b>Name and Address of IEC/IRB</b>                                                                                     |  |
|                                                        | Rikshospitalet<br>Rev. poliklinik Sognsvannsvn.20<br>NO-0027 Oslo Norway                  | Regional komite for Medisinsk<br>Forskningsetikk Postboks 1130 Blindern<br>0318 Oslo Norway                            |  |
|                                                        | 2845 Aventura Blvd., Suite 100<br>Aventura FL 33180 United States                         | Western International Review Board<br>3535 Seventh Avenue SW Olympia, WA<br>98502 United States                        |  |
|                                                        | Limburgs Universitair Centrum<br>Biomedical Research Institute<br>Diepenbeek 3590 Belgium | Commissie Medische Ethiek<br>Biomedical Research Institute Limburgs<br>Universitair Centrum Diepenbeek 3590<br>Belgium |  |

| <b>List of Investigators and Corresponding IEC/IRB</b> |                                                                                                                               |                                                                                                                                                      |  |
|--------------------------------------------------------|-------------------------------------------------------------------------------------------------------------------------------|------------------------------------------------------------------------------------------------------------------------------------------------------|--|
|                                                        | <b>Site Name/Post Office Address</b>                                                                                          | <b>Name and Address of IEC/IRB</b>                                                                                                                   |  |
|                                                        | Bluegrass Clinical Research, Inc.<br>5512 Bardstown Road, Suite 2<br>Louisville, KY 40291 United States                       | Western International Review Board<br>3535 Seventh Avenue SW<br>Olympia, WA 98502 United States                                                      |  |
|                                                        | Hospital Clinico Universitario de Santiago Department Reumatologia Travasia a Choupana s/n Santiago de Compostela 15706 Spain | Comite Etico de Investigacion Clinica de Galicia Servicio Galego de Saude Edificio Administrativo San Lazaro, s/n Santiago de Compostela 15703 Spain |  |

| <b>List of Investigators and Corresponding IEC/IRB</b> |                                                                                                                                        |                                                                                                                                                                                                                                                                                                         |  |
|--------------------------------------------------------|----------------------------------------------------------------------------------------------------------------------------------------|---------------------------------------------------------------------------------------------------------------------------------------------------------------------------------------------------------------------------------------------------------------------------------------------------------|--|
|                                                        | <b>Site Name/Post Office Address</b>                                                                                                   | <b>Name and Address of IEC/IRB</b>                                                                                                                                                                                                                                                                      |  |
|                                                        | Immanuel-Krankenhaus,<br>Rheumaklinik<br>Klinik-und<br>Heimbetriebsgesellschaft mbH<br>Karower Strasse 11 Berlin-Buch<br>13125 Germany | Local: Ethik-Kommission der Ärztekammer<br>Berlin<br>Friedrichstrasse 16 Berlin 10969 Germany<br>Central: Universitaet Erlangen-Nuernberg<br>Ethik-Kommission der Medizinischen<br>Fakultaet der<br>Friedrich-Alexander-Universitaet<br>Erlangen/Nuernberg Krankenhausstr. 12<br>Erlangen 91054 Germany |  |

| <b>List of Investigators and Corresponding IEC/IRB</b> |                                                                                                                       |                                                                                                                                                                                               |  |
|--------------------------------------------------------|-----------------------------------------------------------------------------------------------------------------------|-----------------------------------------------------------------------------------------------------------------------------------------------------------------------------------------------|--|
|                                                        | <b>Site Name/Post Office Address</b>                                                                                  | <b>Name and Address of IEC/IRB</b>                                                                                                                                                            |  |
|                                                        | Klinikum der Universitaet Munich<br>Rheumatologie/Klinische Studien<br>Pettenkoflerstrasse 8a Munich 80336<br>Germany | Universitaet Erlangen-Nuernberg<br>Ethik-Kommission der Medizinischen<br>Fakultaet der<br>Friedrich-Alexander-Universitaet<br>Erlangen/Nuernberg Krankenhausstr. 12<br>Erlangen 91054 Germany |  |

| <b>List of Investigators and Corresponding IEC/IRB</b> |                                                                                                                   |                                                                                                                                                            |  |
|--------------------------------------------------------|-------------------------------------------------------------------------------------------------------------------|------------------------------------------------------------------------------------------------------------------------------------------------------------|--|
|                                                        | <b>Site Name/Post Office Address</b>                                                                              | <b>Name and Address of IEC/IRB</b>                                                                                                                         |  |
|                                                        | Uppsala University Hospital<br>Akademiska sjukhuset<br>Department of Rheumatology<br>Uppsala 75185 Sweden         | Regionala etikprovningnamnden i<br>Stockholm<br>FE 289 (mail address) Karolinska Institutet<br>Nobels vag 12A (visitors address) Stockholm<br>17177 Sweden |  |
|                                                        | Houston Institute for Clinical<br>Research 7777 Southwest Freeway<br>Suite 720 Houston, TX 77074 United<br>States | Western International Review Board<br>3535 Seventh Avenue SW Olympia, WA<br>98502 United States                                                            |  |
|                                                        | Garvan Institute Building<br>384 Victoria Street<br>Darlinghurst NSW 2010 Australia                               | St. Vincent's Hospital Research Ethics<br>Committee<br>St. Vincent's Hospital Victoria Street<br>Darlinghurst, NSW 2010 Australia                          |  |

| <b>List of Investigators and Corresponding IEC/IRB</b> |                                                                                |                                                                                                                                                                                                                                 |  |
|--------------------------------------------------------|--------------------------------------------------------------------------------|---------------------------------------------------------------------------------------------------------------------------------------------------------------------------------------------------------------------------------|--|
|                                                        | <b>Site Name/Post Office Address</b>                                           | <b>Name and Address of IEC/IRB</b>                                                                                                                                                                                              |  |
|                                                        | Suite 13 Surgicentre 38 Ranelagh<br>Crescent South Perth, WA 6151<br>Australia | Sir Charles Gairdner Hospital Institutional<br>Research Ethics Committee Department of<br>Rheumatology C Block, 1 <sup>st</sup> Floor, Room<br>S1-88 Sir Charles Gairdner Hospital Verdun<br>Street Nedlands, WA 6009 Australia |  |

| <b>List of Investigators and Corresponding IEC/IRB</b> |                                                                                                                   |                                                                                                      |  |
|--------------------------------------------------------|-------------------------------------------------------------------------------------------------------------------|------------------------------------------------------------------------------------------------------|--|
|                                                        | <b>Site Name/Post Office Address</b>                                                                              | <b>Name and Address of IEC/IRB</b>                                                                   |  |
|                                                        | Institut de Rhumatologie de<br>Montreal 1551 rue Ontario Est, 2 <sup>e</sup><br>étage Montreal, QC H2L 1S6 Canada | Institutional Review Board Services<br>372 Hollandview Trail, Suite 300 Aurora,<br>ON L4G 0A5 Canada |  |
|                                                        | 4004 Ben Franklin Boulevard<br>Durham, NC 27704 United States                                                     | Western International Review Board<br>3535 Seventh Avenue SW Olympia, WA<br>98502 United States      |  |
|                                                        | Rheumatology Research Unit<br>Level 6-Box 194 Addenbrookes<br>Hospital Hills Road Cambridge CB2<br>QQ             | Cambridge LREC<br>Box 148 Addenbrookes NHS Trust Hills<br>Road Cambridge CB2 2QQ                     |  |

| <b>List of Investigators and Corresponding IEC/IRB</b> |                                                                                                                                                                        |                                                                                                                             |  |
|--------------------------------------------------------|------------------------------------------------------------------------------------------------------------------------------------------------------------------------|-----------------------------------------------------------------------------------------------------------------------------|--|
|                                                        | <b>Site Name/Post Office Address</b>                                                                                                                                   | <b>Name and Address of IEC/IRB</b>                                                                                          |  |
|                                                        | Medizinische Universitaetsklinik<br>Graz Universitaetsklinik fuer Innere<br>Medizin Klinische Abteilung fuer<br>Rheumatologie Auenbruggerplatz 15<br>8036 Graz Austria | Ethikkommission des Landeskrankenhauses<br>Universitaetskliniken Graz Auenbruggerplatz<br>29 8036 Graz Austria              |  |
|                                                        | Fundacion Jimenez Diaz Clinica Ntra<br>Sra de la Concepcion Avda. de Reyes<br>Catolicos, 2 28040 Madrid Spain                                                          | CEIC Fundacion Hospital Jiménez Díaz<br>Clínica Ntra Sra de la Concepción Avda. de<br>Reyes Católicos, 2 28040 Madrid Spain |  |
|                                                        | Denver Arthritis Clinic 200 Spruce<br>Street #100 Denver, CO 80230<br>United States                                                                                    | Western International Review Board 3535<br>Seventh Avenue SW Olympia, WA 98502<br>United States                             |  |

| <b>List of Investigators and Corresponding IEC/IRB</b> |                                                                     |                                                                                                                                        |  |
|--------------------------------------------------------|---------------------------------------------------------------------|----------------------------------------------------------------------------------------------------------------------------------------|--|
|                                                        | <b>Site Name/Post Office Address</b>                                | <b>Name and Address of IEC/IRB</b>                                                                                                     |  |
|                                                        | Grasten Gighospital Research Unit<br>Nygade 29 6300 Grasten Denmark | Ethics Committee for Ringkjøbing, Ribe and<br>Sønderjylland The Secretariat<br>Centralhospital Østergade 80 DK 6700<br>Esbjerg Denmark |  |

| <b>List of Investigators and Corresponding IEC/IRB</b> |                                                                                          |                                                                                                 |  |
|--------------------------------------------------------|------------------------------------------------------------------------------------------|-------------------------------------------------------------------------------------------------|--|
|                                                        | <b>Site Name/Post Office Address</b>                                                     | <b>Name and Address of IEC/IRB</b>                                                              |  |
|                                                        | Arthritis Health<br>9097 E. Desert Cove, Suite 100<br>Scottsdale, AZ 85260 United States | Western International Review Board<br>3535 Seventh Avenue SW Olympia, WA<br>98502 United States |  |
|                                                        | McBride Clinic 1110 N. Lee<br>Oklahoma City, OK 73103 United<br>States                   | Western International Review Board 3535<br>Seventh Avenue SW Olympia, WA 98502<br>United States |  |

| <b>List of Investigators and Corresponding IEC/IRB</b> |                                                                                                                                 |                                                                                                                                                                              |  |
|--------------------------------------------------------|---------------------------------------------------------------------------------------------------------------------------------|------------------------------------------------------------------------------------------------------------------------------------------------------------------------------|--|
|                                                        | <b>Site Name/Post Office Address</b>                                                                                            | <b>Name and Address of IEC/IRB</b>                                                                                                                                           |  |
|                                                        | 9850 Genessee Avenue, Suite 810<br>La Jolla, CA 92037<br>United States                                                          | Western International Review Board<br>3535 Seventh Avenue SW<br>Olympia, WA 98502 United States                                                                              |  |
|                                                        | Hobart Rheumatology Practice<br>4 Warneford Street South Hobart<br>TAS 7004 Australia                                           | Southern Tasmania Health & Medical<br>Human Research Ethics Committee Research<br>& Development Office University of<br>Tasmania Private Bag 01 Hobart TAS 7001<br>Australia |  |
|                                                        | Hospital Universitario Clinico San<br>Carlos Servicio de Reumatologia<br>Calle del Prof Martin Lagos, s/n<br>Madrid 28040 Spain | Hospital Universitario Germans Trias i Pujol<br>Comite Etico de Investigacion Clinica Ctra.<br>de Canyet, s/n Badalona - Barcelona 08915<br>Spain                            |  |

| <b>List of Investigators and Corresponding IEC/IRB</b> |                                                                      |                                                                                                 |  |
|--------------------------------------------------------|----------------------------------------------------------------------|-------------------------------------------------------------------------------------------------|--|
|                                                        | <b>Site Name/Post Office Address</b>                                 | <b>Name and Address of IEC/IRB</b>                                                              |  |
|                                                        | 1945 Versailles Street Suite 101<br>Sarasota, FL 34239 United States | Western International Review Board 3535<br>Seventh Avenue SW Olympia, WA 98502<br>United States |  |



| <b>List of Investigators and Corresponding IEC/IRB</b> |                                                                                                                                                                   |                                                                                                                                                                   |  |
|--------------------------------------------------------|-------------------------------------------------------------------------------------------------------------------------------------------------------------------|-------------------------------------------------------------------------------------------------------------------------------------------------------------------|--|
|                                                        | <b>Site Name/Post Office Address</b>                                                                                                                              | <b>Name and Address of IEC/IRB</b>                                                                                                                                |  |
|                                                        | Med. Klinik III mit Poliklinik<br>der Friedrich-Alexander-<br>Universitaet Rheumatologische<br>Studienambulanz<br>Krankenhausstrasse 12 91054<br>Erlangen Germany | Ethik-Kommission der<br>Medizinischen Fakultaeet der Friedrich-<br>Alexander-Universitaet Erlangen-Nuernberg<br>Universitaetsstrasse 40 91054 Erlangen<br>Germany |  |
|                                                        | Finnish Rheumatism Foundation<br>Hospital Rheumatism Foundation<br>Hospital Pikijaerventie 1 Heinola<br>FI-18120 Finland                                          | Hospital District of Helsinki and Uusimaa<br>Ethics Committee Department of Medicine<br>Box 340 Hus 00029 Finland                                                 |  |

| <b>List of Investigators and Corresponding IEC/IRB</b> |                                                                                                                                                            |                                                                                                                                                                                                                                                                                                                                                                                                                    |  |
|--------------------------------------------------------|------------------------------------------------------------------------------------------------------------------------------------------------------------|--------------------------------------------------------------------------------------------------------------------------------------------------------------------------------------------------------------------------------------------------------------------------------------------------------------------------------------------------------------------------------------------------------------------|--|
|                                                        | <b>Site Name/Post Office Address</b>                                                                                                                       | <b>Name and Address of IEC/IRB</b>                                                                                                                                                                                                                                                                                                                                                                                 |  |
|                                                        | UCSD/Thornton Hospital<br>9320 Campus Point Drive<br>Suite A-225<br>La Jolla, CA 92037-0943<br>United States                                               | UCSD Human Subjects Protection Program<br>La Jolla Village Professional Center<br>8950 La Jolla Village Drive<br>La Jolla, CA 92037-0052<br>United States                                                                                                                                                                                                                                                          |  |
|                                                        | Fachkrankenhaus fuer Orthopaedie<br>und Rheumatologie Klinikum fuer<br>Rheumatologie Sophie von<br>Boetticher Str. 1<br>Vogelsang-Gommern 39245<br>Germany | Local: Fachkrankenhaus fuer Orthopaedie<br>und Rheumatologie Ethik-Kommission der<br>Otto-von-Guericke-Universitaet an der<br>medizinischen Fakultaeet Leipziger Str. 44<br>Magdeburg 39120 Germany<br><br>Central: Universitaet Erlangen-Nuernberg<br>Ethik-Kommission der Medizinischen<br>Fakultaeet der<br>Friedrich-Alexander-Universitaet<br>Erlangen/Nuernberg Krankenhausstr. 12<br>Erlangen 91054 Germany |  |

| <b>List of Investigators and Corresponding IEC/IRB</b> |                                                                                                                                 |                                                                                           |  |
|--------------------------------------------------------|---------------------------------------------------------------------------------------------------------------------------------|-------------------------------------------------------------------------------------------|--|
|                                                        | <b>Site Name/Post Office Address</b>                                                                                            | <b>Name and Address of IEC/IRB</b>                                                        |  |
|                                                        | Rheumatologische Einheit der Ludwig-Maximilians-Universitaet Medizinische Poliklinik Pettenkofenstrasse 8a 80336 Munich Germany | Bayerische Landesaeztekammer Muehlbauerstr. 16 D-81677 Muechen Germany                    |  |
|                                                        | 105 West 8th Avenue Suite 6080 Spokane, WA 99204 United States                                                                  | Western International Review Board 3535 Seventh Avenue SW Olympia, WA 98502 United States |  |

| <b>List of Investigators and Corresponding IEC/IRB</b> |                                                                                                                                       |                                                                                                                                          |  |
|--------------------------------------------------------|---------------------------------------------------------------------------------------------------------------------------------------|------------------------------------------------------------------------------------------------------------------------------------------|--|
|                                                        | <b>Site Name/Post Office Address</b>                                                                                                  | <b>Name and Address of IEC/IRB</b>                                                                                                       |  |
|                                                        | The Division of Advanced Therapeutics Mount Sinai Hospital 60 Murray Street, 2 <sup>nd</sup> Floor, Rm 205 Toronto, ON M5T 3L9 Canada | Research Ethics Board Mount Sinai Hospital 600 University Avenue, Rm 1003A Toronto, ON M5G 1X5 Canada                                    |  |
|                                                        | 120 Stavanger Drive, Suite 102 St. John's, NL A1A 5E8 Canada                                                                          | Human Research Ethics Board 95 Bonaventure Avenue, Suite 200 St. John's, NL A1B 2X5 Canada                                               |  |
|                                                        | Department of Rheumatology 4th Floor – Thomas Guy House Guy's Hospital St. Thomas Street London SE1 9RT UK                            | Guy's Research Ethics Committee Department of Nephrology & Transplantation 5th Floor – Thomas Guy House Guy's Hospital London SE1 9RT UK |  |

| <b>List of Investigators and Corresponding IEC/IRB</b> |                                                              |                                                                                                 |  |
|--------------------------------------------------------|--------------------------------------------------------------|-------------------------------------------------------------------------------------------------|--|
|                                                        | <b>Site Name/Post Office Address</b>                         | <b>Name and Address of IEC/IRB</b>                                                              |  |
|                                                        | 175 Meadowbrook Lane<br>Duncansville, PA 16635 United States | Western International Review Board<br>3535 Seventh Avenue SW Olympia, WA<br>98502 United States |  |

| <b>List of Investigators and Corresponding IEC/IRB</b> |                                                                   |                                                                                                |  |
|--------------------------------------------------------|-------------------------------------------------------------------|------------------------------------------------------------------------------------------------|--|
|                                                        | <b>Site Name/Post Office Address</b>                              | <b>Name and Address of IEC/IRB</b>                                                             |  |
|                                                        | Karolinska Hospital Dept. of Rheumatology 171 76 Stockholm Sweden | Karolinska Institute's Regional Research Ethics Committee Nobels väg 5 171 76 Stockholm Sweden |  |

| <b>List of Investigators and Corresponding IEC/IRB</b> |                                                                                                                                                                                                                                                                  |                                                                                           |  |
|--------------------------------------------------------|------------------------------------------------------------------------------------------------------------------------------------------------------------------------------------------------------------------------------------------------------------------|-------------------------------------------------------------------------------------------|--|
|                                                        | <b>Site Name/Post Office Address</b>                                                                                                                                                                                                                             | <b>Name and Address of IEC/IRB</b>                                                        |  |
|                                                        | Klein & Associates, MD, PA The Osteoporosis & Clinical Trials Center 346/348 Mill Street Hagerstown, MD 21740 United States Klein & Associates, MD, PA The Osteoporosis & Clinical Trials Center 921 Seton Drive, Suite C & D Cumberland, MD 21502 United States | Western International Review Board 3535 Seventh Avenue SW Olympia, WA 98502 United States |  |

| <b>List of Investigators and Corresponding IEC/IRB</b> |                                                                                                                |                                                                                                                                                            |  |
|--------------------------------------------------------|----------------------------------------------------------------------------------------------------------------|------------------------------------------------------------------------------------------------------------------------------------------------------------|--|
|                                                        | <b>Site Name/Post Office Address</b>                                                                           | <b>Name and Address of IEC/IRB</b>                                                                                                                         |  |
|                                                        | Uppsala University Hospital<br>Akademiska sjukhuset Department<br>of Rheumatology Uppsala 75185<br>Sweden      | Regionala etikprovningssamfundet i<br>Stockholm FE 289 (mail address) Karolinska<br>Institutet Nobels vag 12A (visitors address)<br>Stockholm 17177 Sweden |  |
|                                                        | Pacific Arthritis Center Medical<br>Group 607 East Plaza Drive, Suite A<br>Santa Maria, CA 93454 United States | Western International Review Board 3535<br>Seventh Avenue SW Olympia, WA 98502<br>United States                                                            |  |

| <b>List of Investigators and Corresponding IEC/IRB</b> |                                                                                                                                        |                                                                                                                                                                                                                                                                                                         |  |
|--------------------------------------------------------|----------------------------------------------------------------------------------------------------------------------------------------|---------------------------------------------------------------------------------------------------------------------------------------------------------------------------------------------------------------------------------------------------------------------------------------------------------|--|
|                                                        | <b>Site Name/Post Office Address</b>                                                                                                   | <b>Name and Address of IEC/IRB</b>                                                                                                                                                                                                                                                                      |  |
|                                                        | Immanuel-Krankenhaus,<br>Rheumaklinik<br>Klinik-und<br>Heimbetriebsgesellschaft mbH<br>Karower Strasse 11 Berlin-Buch<br>13125 Germany | Local: Ethik-Kommission der Arztekammer<br>Berlin<br>Friedrichstrasse 16 Berlin 10969 Germany<br>Central: Universitaet Erlangen-Nuernberg<br>Ethik-Kommission der Medizinischen<br>Fakultaet der<br>Friedrich-Alexander-Universitaet<br>Erlangen/Nuernberg Krankenhausstr. 12<br>Erlangen 91054 Germany |  |
|                                                        | The Center for Rheumatology<br>1367 Washington Ave., Suite 101<br>Albany, NY 12206 United States                                       | Western International Review Board<br>3535 Seventh Avenue SW Olympia, WA<br>98502 United States                                                                                                                                                                                                         |  |

| <b>List of Investigators and Corresponding IEC/IRB</b> |                                                                                                                                                   |                                                                                                                           |  |
|--------------------------------------------------------|---------------------------------------------------------------------------------------------------------------------------------------------------|---------------------------------------------------------------------------------------------------------------------------|--|
|                                                        | <b>Site Name/Post Office Address</b>                                                                                                              | <b>Name and Address of IEC/IRB</b>                                                                                        |  |
|                                                        | Diakonihjemmets Sykehus<br>Rev. poliklinik Boks 23 Vinderen<br>NO-0319 Oslo Norway                                                                | Regional komite for Medisinsk<br>Forskningsetikk Postboks 1130 Blindern<br>NO-0318 Oslo Norway                            |  |
|                                                        | Arthritis Associates & Osteoporosis<br>Center of Colorado Springs<br>215 Parkside Drive, Suite 200<br>Colorado Springs, CO 80910 United<br>States | Western International Review Board<br>3535 Seventh Avenue SW<br>Olympia, WA 98502 United States                           |  |
|                                                        | Rheumazentrum Baden Baden<br>Rotenbachtalstrasse 5<br>76530 Baden Baden Germany                                                                   | Landesaerztekammer Baden-Wuerttemberg<br>Koerperschaft des oeffentlichen Rechts<br>Jahnstrasse 40 70597 Stuttgart Germany |  |

| <b>List of Investigators and Corresponding IEC/IRB</b> |                                                                                                                                                                                                             |                                                                                                                            |  |
|--------------------------------------------------------|-------------------------------------------------------------------------------------------------------------------------------------------------------------------------------------------------------------|----------------------------------------------------------------------------------------------------------------------------|--|
|                                                        | <b>Site Name/Post Office Address</b>                                                                                                                                                                        | <b>Name and Address of IEC/IRB</b>                                                                                         |  |
|                                                        | Goatcher Clinical Research Unit<br>Department of Rheumatology C<br>Block, 1 <sup>st</sup> Floor, Room S1-88 Sir<br>Charles Gairdner Hospital Verdun<br>Street Nedlands, Western Australia<br>6009 Australia | Human Research Ethics Committee Sir<br>Charles Gairdner Hospital Verdun Street<br>Nedlands, WA 6009 Australia              |  |
|                                                        | Helsinki University Central Hospital<br>Reumatologian klinikka Box 263<br>HUS Helsinki 00029 Finland                                                                                                        | Hospital District of Helsinki and Uusimaa<br>Ethics Committee Department of Medicine<br>Box 340 Hus Helsinki 00029 Finland |  |

| <b>List of Investigators and Corresponding IEC/IRB</b> |                                                                                                                                   |                                                                                                                         |  |
|--------------------------------------------------------|-----------------------------------------------------------------------------------------------------------------------------------|-------------------------------------------------------------------------------------------------------------------------|--|
|                                                        | <b>Site Name/Post Office Address</b>                                                                                              | <b>Name and Address of IEC/IRB</b>                                                                                      |  |
|                                                        | Rheumatology Department 3 <sup>rd</sup> Floor,<br>E Block Monash Medical Centre 246<br>Clayton Road Clayton VIC 3168<br>Australia | Southern Health Human Research Ethics<br>Committee Monash Medical Centre 246<br>Clayton Road Clayton VIC 3168 Australia |  |

| <b>List of Investigators and Corresponding IEC/IRB</b> |                                                                                                            |                                                                                                 |  |
|--------------------------------------------------------|------------------------------------------------------------------------------------------------------------|-------------------------------------------------------------------------------------------------|--|
|                                                        | <b>Site Name/Post Office Address</b>                                                                       | <b>Name and Address of IEC/IRB</b>                                                              |  |
|                                                        | East Penn Rheumatology Associates,<br>PC 701 Ostrum Street, Suite 402<br>Bethlehem, PA 18015 United States | Western International Review Board<br>3535 Seventh Avenue SW Olympia, WA<br>98502 United States |  |

| <b>List of Investigators and Corresponding IEC/IRB</b> |                                                                                                                           |                                                                                                                                                           |  |
|--------------------------------------------------------|---------------------------------------------------------------------------------------------------------------------------|-----------------------------------------------------------------------------------------------------------------------------------------------------------|--|
|                                                        | <b>Site Name/Post Office Address</b>                                                                                      | <b>Name and Address of IEC/IRB</b>                                                                                                                        |  |
|                                                        | Univ. Klinik fuer Innere Medizin III,<br>Klin. Abt. fuer Rheumatologie<br>Waehringer Guertel 18-20 1090<br>Vienna Austria | Ethik-Kommission der Medizinischen<br>Universitaet Wien und des Allgemeinen<br>Krankenhauses der Stadt Wien AKH<br>Borschkegasse 8b/6 1090 Vienna Austria |  |
|                                                        | Research Point 1594 Route 9 Bldg. 1<br>Toms River, NJ 08755 United<br>States                                              | Western International Review Board 3535<br>Seventh Avenue SW Olympia, WA 98502<br>United States                                                           |  |
|                                                        | Department of Rheumatology<br>Ysbyty Gwynedd Hospital<br>Penrhosgarnedd Bangor LL57 2PW<br>UK                             | Clinical Governance Support Unit Ysbyty<br>Gwynedd Bangor LL57 2PW UK                                                                                     |  |
|                                                        | PRO Research 633 E. 11 <sup>th</sup> Avenue<br>Eugene, OR 97401 United States                                             | Western International Review Board 3535<br>Seventh Avenue SW Olympia, WA 98502<br>United States                                                           |  |

| <b>List of Investigators and Corresponding IEC/IRB</b> |                                                                                                                                                              |                                                                                                         |  |
|--------------------------------------------------------|--------------------------------------------------------------------------------------------------------------------------------------------------------------|---------------------------------------------------------------------------------------------------------|--|
|                                                        | <b>Site Name/Post Office Address</b>                                                                                                                         | <b>Name and Address of IEC/IRB</b>                                                                      |  |
|                                                        | Rheumatology Department<br>Medical Outpatient Department<br>Level 2 North Block The Royal<br>Newcastle Center Lookout Road<br>New Lambton NSW 2305 Australia | Hunter New England Research Ethics Unit<br>Locked Bag 1, Lookout Road New Lambton<br>NSW 2305 Australia |  |

| <b>List of Investigators and Corresponding IEC/IRB</b> |                                                                                                      |                                                                                                                                                |  |
|--------------------------------------------------------|------------------------------------------------------------------------------------------------------|------------------------------------------------------------------------------------------------------------------------------------------------|--|
|                                                        | <b>Site Name/Post Office Address</b>                                                                 | <b>Name and Address of IEC/IRB</b>                                                                                                             |  |
|                                                        | CHU Sart Tilman, Liege<br>Domaine Universitaire du Sart<br>Tilman Batiment B35 Liege 4000<br>Belgium | CHU Sart Tilman, Liege<br>Faculty of Medicine, Ethics Committee<br>University of Liege Domaine Universitaire<br>Sart-Tilman Liege 4000 Belgium |  |
|                                                        | 346 Mill Street<br>Hagerstown, MD 21740<br>United States                                             | Western International Review Board<br>3535 Seventh Avenue SW<br>Olympia, WA 98502 United States                                                |  |

| <b>List of Investigators and Corresponding IEC/IRB</b> |                                                                                                      |                                                                                                                     |  |
|--------------------------------------------------------|------------------------------------------------------------------------------------------------------|---------------------------------------------------------------------------------------------------------------------|--|
|                                                        | <b>Site Name/Post Office Address</b>                                                                 | <b>Name and Address of IEC/IRB</b>                                                                                  |  |
|                                                        | Hospital Universitario Nuestra Senora de Valme Ctra. Cadiz, s/n Sevilla 41014 Spain                  | Comite Etico de Investigacion Clinica Hospital Universitario de Valme Ctra. Cadiz, s/n 41014 Sevilla Spain          |  |
|                                                        | Hospital General de Alicante Pintor Baeza, s/n 03010 Alicante Spain                                  | Comité Etico de Investigación Clínic Hospital General Alicante Pinto Baeza, s/n 03010 Alicante Spain                |  |
|                                                        | Oddeleni klinicke farmakologie Fakultni nemocnice Plzen Dr. E. Benese 13 Plzen 305 99 Czech Republic | Eticka Komise FN a LF UK v Plzni Dr. E. Benese 13 Plzen 305 99 Czech Republic                                       |  |
|                                                        | Rheumazentrum Baden Baden Rotenbachtalstrasse 5 76530 Baden Baden Germany                            | Landesaerztekammer Baden-Wuerttemberg Koerperschaft des oeffentlichen Rechts Jahnstrasse 40 70597 Stuttgart Germany |  |

| <b>List of Investigators and Corresponding IEC/IRB</b> |                                                                              |                                                                                                               |  |
|--------------------------------------------------------|------------------------------------------------------------------------------|---------------------------------------------------------------------------------------------------------------|--|
|                                                        | <b>Site Name/Post Office Address</b>                                         | <b>Name and Address of IEC/IRB</b>                                                                            |  |
|                                                        | Cork University Hospital Department of Rheumatology Wilton Road Cork Ireland | Clinical Res. Ethics Comm. of the Cork Teaching Hospitals Lancaster Hall 6 Little Hanover Street Cork Ireland |  |
|                                                        | Arthritis Care Center 1835 Park Avenue San Jose, CA 95126 United States      | Western International Review Board 3535 Seventh Avenue SW Olympia, WA 98502 United States                     |  |



| <b>List of Investigators and Corresponding IEC/IRB</b> |                                                                                                                                                                      |                                                                                                                                                                                |  |
|--------------------------------------------------------|----------------------------------------------------------------------------------------------------------------------------------------------------------------------|--------------------------------------------------------------------------------------------------------------------------------------------------------------------------------|--|
|                                                        | <b>Site Name/Post Office Address</b>                                                                                                                                 | <b>Name and Address of IEC/IRB</b>                                                                                                                                             |  |
|                                                        | Rheumatology Research Unit<br>Sunshine Coast Maroochy Waters<br>Shopping Centre 9-10 Denna Street<br>Maroochydoore QLD 4558 Australia                                | Royal Brisbane & Women's Hospital<br>Human Research Ethics Committee Level 7,<br>Block 7 Royal Brisbane & Woman's<br>Hospital Butterfield Street Herston QLD<br>4029 Australia |  |
|                                                        | Groupe Hospitalier Cochin<br>Service de Rhumatologie B<br>Groupement universitaire hospitalier<br>Ouest 27 rue du Faubourg St Jacques<br>75679 Paris Cedex 14 France | CCP Ile de France IV de Saint Louis<br>Hopital Saint Louis<br>1 Avenue Claude Vellefaux Paris 75475<br>Cedex 10 France                                                         |  |

| <b>List of Investigators and Corresponding IEC/IRB</b> |                                                                   |                                                                                                                          |  |
|--------------------------------------------------------|-------------------------------------------------------------------|--------------------------------------------------------------------------------------------------------------------------|--|
|                                                        | <b>Site Name/Post Office Address</b>                              | <b>Name and Address of IEC/IRB</b>                                                                                       |  |
|                                                        | Oulu University Hospital<br>P.O. Box 20<br>FIN-90029 OYS Finland  | Hospital District of Helsinki and Uusimaa<br>Ethics Committee Department of Medicine<br>PO Box 340 FIN-00020 HUS Finland |  |
|                                                        | Centrallasarettet<br>Reumatologkliniken<br>721 89 Västaras Sweden | Karolinska Instituts Regional Research<br>Ethics Committee<br>Nobels väg 5 171 76 Stockholm Sweden                       |  |

| <b>List of Investigators and Corresponding IEC/IRB</b> |                                                                                                            |                                                                                                                                           |  |
|--------------------------------------------------------|------------------------------------------------------------------------------------------------------------|-------------------------------------------------------------------------------------------------------------------------------------------|--|
|                                                        | <b>Site Name/Post Office Address</b>                                                                       | <b>Name and Address of IEC/IRB</b>                                                                                                        |  |
|                                                        | Hospital General de Alicante<br>Servicio de Reumatologia C/.<br>Maestro Alonso s/n Alicante 03010<br>Spain | CEIC Hospital General Universitario de<br>Alicante Planta 3. Edificio gris C/. Maestro<br>Alonso 109 Alicante 03010 Spain                 |  |
|                                                        | Revmatologicky ustav<br>Na Slupi 4 Prague 2 128 50 Czech<br>Republic                                       | Eticka komise Revmatologicky ustav<br>Na Slupi 4 Prague 2 128 50 Czech Republic                                                           |  |
|                                                        | CHU Rennes - Hospital Sud<br>Service de Rhumatologie 16<br>Boulevard de Bulgarie Rennes 35056<br>France    | CCPPRB de Paris St Louis - Hopital St<br>Louis Porte 5 du Carre historique – 1, avenue<br>Claude Vellefaux 75475 Paris Cedex 10<br>France |  |

| <b>List of Investigators and Corresponding IEC/IRB</b> |                                                                                                                            |                                                                                                                                                                                                                                                                                                                              |  |
|--------------------------------------------------------|----------------------------------------------------------------------------------------------------------------------------|------------------------------------------------------------------------------------------------------------------------------------------------------------------------------------------------------------------------------------------------------------------------------------------------------------------------------|--|
|                                                        | <b>Site Name/Post Office Address</b>                                                                                       | <b>Name and Address of IEC/IRB</b>                                                                                                                                                                                                                                                                                           |  |
|                                                        | Klinikum der Albert-Ludwigs-<br>Universitaet Abteilung IV<br>Rheumatologie Hugstetter Strasse 55<br>Freiburg 79106 Germany | Local: Klinikum der Albert-Ludwigs-<br>Universitaet Ethik-Kommission Engelberger<br>Str. 21 Freiburg 79106 Germany Central:<br>Universitaet Erlangen-Nuernberg<br>Ethik-Kommission der Medizinischen<br>Fakultaet der<br>Friedrich-Alexander-Universitaet<br>Erlangen/Nuernberg Krankenhausstr. 12<br>Erlangen 91054 Germany |  |
|                                                        | 1301 West 38th Street<br>Suite 110<br>Austin, TX 78705 United States                                                       | Western International Review Board<br>3535 Seventh Avenue SW<br>Olympia, WA 98502 United States                                                                                                                                                                                                                              |  |

| <b>List of Investigators and Corresponding IEC/IRB</b> |                                                                                             |                                                                                                                                    |  |
|--------------------------------------------------------|---------------------------------------------------------------------------------------------|------------------------------------------------------------------------------------------------------------------------------------|--|
|                                                        | <b>Site Name/Post Office Address</b>                                                        | <b>Name and Address of IEC/IRB</b>                                                                                                 |  |
|                                                        | Rheumatology Department Queen Elizabeth Hospital Woodville Road Woodville SA 5011 Australia | North Western Adelaide Health Service Ethics of Human Research Queen Elizabeth Hospital Woodville Road Woodville SA 5011 Australia |  |

| <b>List of Investigators and Corresponding IEC/IRB</b> |                                                                                                                    |                                                                                                                                                                                                                                                                                                                                                  |  |
|--------------------------------------------------------|--------------------------------------------------------------------------------------------------------------------|--------------------------------------------------------------------------------------------------------------------------------------------------------------------------------------------------------------------------------------------------------------------------------------------------------------------------------------------------|--|
|                                                        | <b>Site Name/Post Office Address</b>                                                                               | <b>Name and Address of IEC/IRB</b>                                                                                                                                                                                                                                                                                                               |  |
|                                                        | Universitair Medisch Centrum Groningen<br>Dept Of Reumatology<br>Hanzeplein 1 Groningen 9713 GZ<br>The Netherlands | Local: Commissie Mensgebonden Onderzoek (CMO)<br>Regio Arnhem-Nijmegen Radboud Universitair Medisch Centrum P.O. Box 9101 Geert Grooteplein 10 Nijmegen 6500 HB The Netherlands<br>Central: Commissie Mensgebonden Onderzoek (CMO) Regio Arnhem-Nijmegen P/A UMC St. Radboud Huispost 531, Geert Grooteplein 10 Nijmegen 6525 GA The Netherlands |  |
|                                                        | Health Core, Inc.<br>4735 Ogletown-Stanton Road, Suite 3201 Newark, DE 19713-2094<br>United States                 | Western International Review Board<br>3535 Seventh Avenue SW<br>Olympia, WA 98502 United States                                                                                                                                                                                                                                                  |  |

| <b>List of Investigators and Corresponding IEC/IRB</b> |                                                                                         |                                                                                                                                            |  |
|--------------------------------------------------------|-----------------------------------------------------------------------------------------|--------------------------------------------------------------------------------------------------------------------------------------------|--|
|                                                        | <b>Site Name/Post Office Address</b>                                                    | <b>Name and Address of IEC/IRB</b>                                                                                                         |  |
|                                                        | Norrlands Universitets sjukhus<br>Rematologkliniken 901 85 Umea<br>Sweden               | Karolinska Institute's Regional Research<br>Ethics Committee Nobels väg 5 171 77<br>Stockholm Sweden                                       |  |
|                                                        | Evangelisches Fachkrankenhaus<br>Rheumatologie Rosenstrasse 2 40882<br>Ratingen Germany | Ethikkommission der Medizinischen<br>Fakultaet der Heinrich Heine Universitaet<br>Duesseldorf Moorenstrasse 5 40225<br>Duesseldorf Germany |  |
|                                                        | 12395 El Camino Real<br>Suite 117<br>San Diego, CA 92130 United States                  | Western International Review Board<br>3535 Seventh Avenue SW<br>Olympia, WA 98502 United States                                            |  |

| <b>List of Investigators and Corresponding IEC/IRB</b> |                                                                                                                            |                                                                                                                                                                                                       |  |
|--------------------------------------------------------|----------------------------------------------------------------------------------------------------------------------------|-------------------------------------------------------------------------------------------------------------------------------------------------------------------------------------------------------|--|
|                                                        | <b>Site Name/Post Office Address</b>                                                                                       | <b>Name and Address of IEC/IRB</b>                                                                                                                                                                    |  |
|                                                        | Rheumatology Department Level 5C,<br>Tower Block Queen Elizabeth<br>Hospital Woodville Road Woodville<br>SA 5011 Australia | Central Northern Adelaide Health Service<br>Ethics of Human Research Committee South<br>Eastern Sydney and Illawarra Health Queen<br>Elizabeth Hospital Woodville Road<br>Woodville SA 5011 Australia |  |

| <b>List of Investigators and Corresponding IEC/IRB</b> |                                                                                                                                                    |                                                                                                                                                            |  |
|--------------------------------------------------------|----------------------------------------------------------------------------------------------------------------------------------------------------|------------------------------------------------------------------------------------------------------------------------------------------------------------|--|
|                                                        | <b>Site Name/Post Office Address</b>                                                                                                               | <b>Name and Address of IEC/IRB</b>                                                                                                                         |  |
|                                                        | Vasteras Hospital<br>Department of Rheumatology<br>Vasteras S-72189 Sweden                                                                         | Regionala etikprovningnamnden i<br>Stockholm<br>FE 289 (mail address) Karolinska Institutet<br>Nobels vag 12A (visitors address) Stockholm<br>17177 Sweden |  |
|                                                        | Goatcher Clinical Research Unit<br>Royal Perth Hospital<br>Shenton Park Campus Thorburn<br>House, 6 Selby Street Shenton Park<br>WA 6008 Australia | Royal Perth Hospital Ethics Committee<br>Kirkman House<br>Wellington Street Campus GPO Box X2213<br>Perth WA 6847 Australia                                |  |
|                                                        | Narodny ustav reumatickych chorob<br>Nabrezie Ivana Krasku 4 Piestany<br>92112 Slovakia                                                            | Eticka komisia pri Nurch<br>Narodnem ustavu reumatickych chorob<br>Nabrezie Ivana Krasku 4 Piestany 321 01<br>Slovakia                                     |  |

| <b>List of Investigators and Corresponding IEC/IRB</b> |                                                                                                                                  |                                                                                                                                              |  |
|--------------------------------------------------------|----------------------------------------------------------------------------------------------------------------------------------|----------------------------------------------------------------------------------------------------------------------------------------------|--|
|                                                        | <b>Site Name/Post Office Address</b>                                                                                             | <b>Name and Address of IEC/IRB</b>                                                                                                           |  |
|                                                        | 562 Heritage Medical Research<br>Centre University of Alberta<br>Edmonton, AB T6G 2S2 Canada                                     | University of Alberta Health Research<br>Ethics Board 308 Campus Tower University<br>of Alberta Edmonton, AB T6G 1K8 Canada                  |  |
|                                                        | Hopital Lapeyronie Service d'<br>Immuno - Rhumatologie 371,<br>Avenue du Douen Gaston Giraud<br>34295 Montpellier Cedex 5 France | CCPPRB de Paris St Louis - Hopital Saint<br>Louis Porte 5 du Carre historique – 1, avenue<br>Claude Vellefaux 75475 Paris Cedex 10<br>France |  |
|                                                        | Austin Rheumatology Research<br>1301 West 38 <sup>th</sup> Street, Suite 110<br>Austin, TX 78705 United States                   | Western International Review Board<br>3535 Seventh Avenue SW<br>Olympia, WA 98502 United States                                              |  |

| <b>List of Investigators and Corresponding IEC/IRB</b> |                                                                                       |                                                                                                 |  |
|--------------------------------------------------------|---------------------------------------------------------------------------------------|-------------------------------------------------------------------------------------------------|--|
|                                                        | <b>Site Name/Post Office Address</b>                                                  | <b>Name and Address of IEC/IRB</b>                                                              |  |
|                                                        | Universitaet Muenchen<br>Rheumaeinheit Pettenkoferstr. 8a<br>D-80336 Muenchen Germany | Bayrische Landesaerztekammer<br>Muenebaurstrasse 16 D-81677 Muenchen<br>Germany                 |  |
|                                                        | 6525 West Sack Drive Suite 108<br>Glendale, AZ 85308 United States                    | Western International Review Board 3535<br>Seventh Avenue SW Olympia, WA 98502<br>United States |  |

| <b>List of Investigators and Corresponding IEC/IRB</b> |                                                                                                                   |                                                                                                                                                                                               |  |
|--------------------------------------------------------|-------------------------------------------------------------------------------------------------------------------|-----------------------------------------------------------------------------------------------------------------------------------------------------------------------------------------------|--|
|                                                        | <b>Site Name/Post Office Address</b>                                                                              | <b>Name and Address of IEC/IRB</b>                                                                                                                                                            |  |
|                                                        | Universitaet Erlangen-Nuernberg<br>Med. Klinik III mit Poliklinik<br>Krankenhausstr. 12 Erlangen 91054<br>Germany | Universitaet Erlangen-Nuernberg<br>Ethik-Kommission der Medizinischen<br>Fakultaet der<br>Friedrich-Alexander-Universitaet<br>Erlangen/Nuernberg Krankenhausstr. 12<br>Erlangen 91054 Germany |  |

| <b>List of Investigators and Corresponding IEC/IRB</b> |                                                                                                                      |                                                                                                                                                                                               |  |
|--------------------------------------------------------|----------------------------------------------------------------------------------------------------------------------|-----------------------------------------------------------------------------------------------------------------------------------------------------------------------------------------------|--|
|                                                        | <b>Site Name/Post Office Address</b>                                                                                 | <b>Name and Address of IEC/IRB</b>                                                                                                                                                            |  |
|                                                        | Klinikum der Universitaet Munich<br>Rheumatologie/Klinische Studien<br>Pettenkofenstrasse 8a Munich 80336<br>Germany | Universitaet Erlangen-Nuernberg<br>Ethik-Kommission der Medizinischen<br>Fakultaet der<br>Friedrich-Alexander-Universitaet<br>Erlangen/Nuernberg Krankenhausstr. 12<br>Erlangen 91054 Germany |  |

| <b>List of Investigators and Corresponding IEC/IRB</b> |                                                                                                                   |                                                                                                                                                                                                                                                                            |  |
|--------------------------------------------------------|-------------------------------------------------------------------------------------------------------------------|----------------------------------------------------------------------------------------------------------------------------------------------------------------------------------------------------------------------------------------------------------------------------|--|
|                                                        | <b>Site Name/Post Office Address</b>                                                                              | <b>Name and Address of IEC/IRB</b>                                                                                                                                                                                                                                         |  |
|                                                        | Denver Arthritis Clinic 200 Spruce<br>Street, #100 Denver, CO 80230<br>United States                              | Western International Review Board 3535<br>Seventh Avenue SW Olympia, WA 98502<br>United States                                                                                                                                                                            |  |
|                                                        | Academisch Ziekenhuis Maastricht<br>Rheumatology Department<br>Debyelaan 25 Maastricht 6229 HX<br>The Netherlands | Local: Commissie Wetenschappelijk<br>Huispost 9101 Postbus 722 Nijmegen 6500<br>HB The Netherlands Central: Commissie<br>Mensgebonden Onderzoek (CMO) Regio<br>Arnhem-Nijmegen p/a UMC St. Radboud<br>Huispost 531 Geert Groteplein 10 Nijmegen<br>6525 GA The Netherlands |  |

| <b>List of Investigators and Corresponding IEC/IRB</b> |                                                                                              |                                                                                                                                                            |
|--------------------------------------------------------|----------------------------------------------------------------------------------------------|------------------------------------------------------------------------------------------------------------------------------------------------------------|
|                                                        | <b>Site Name/Post Office Address</b>                                                         | <b>Name and Address of IEC/IRB</b>                                                                                                                         |
|                                                        | Reuma center Sabbatsbergs Sjukhus<br>Olivekronasvag 5 Stockholm 11324<br>Sweden              | Regionala etikprovningssamfundet i<br>Stockholm FE 289 (mail address) Karolinska<br>Institutet Nobels vag 12A (visitors address)<br>Stockholm 17177 Sweden |
|                                                        | CRIA Research 5333 N. Dixie<br>Highway Suite 110 Fort Lauderdale,<br>FL 33334 United States  | Western International Review Board 3535<br>Seventh Avenue SW Olympia, WA 98502<br>United States                                                            |
|                                                        | c/o Bioclin Health Care, Inc. 6091<br>Gilbert Road, Suite 520 Richmond,<br>BC V7C 5L9 Canada | Institutional Review Board Services 372<br>Hollandview Trail, Suite 300 Aurora, ON<br>L4G 0A5 Canada                                                       |

| <b>List of Investigators and Corresponding IEC/IRB</b> |                                                                                                                            |                                                                                                                     |
|--------------------------------------------------------|----------------------------------------------------------------------------------------------------------------------------|---------------------------------------------------------------------------------------------------------------------|
|                                                        | <b>Site Name/Post Office Address</b>                                                                                       | <b>Name and Address of IEC/IRB</b>                                                                                  |
|                                                        | Hautepierre Hospital<br>Service de Rhumatologie CHU de<br>Strasbourg 1, Avenue Moliere 67098<br>Strasbourg, Cedex 1 France | CCP Ile de France IV de Saint Louis<br>Hopital Saint Louis 1 Avenue Claude<br>Vellefaux 75475 Paris Cedex 10 France |
|                                                        | Florida Medical Clinic, PA<br>Clinical Research Division 38135<br>Market Square Zephyrhillis, FL<br>33542 United States    | Western International Review Board<br>3535 Seventh Avenue SW Olympia, WA<br>98502 United States                     |



| <b>List of Investigators and Corresponding IEC/IRB</b> |                                                                                                                                     |                                                                                                                                                                 |  |
|--------------------------------------------------------|-------------------------------------------------------------------------------------------------------------------------------------|-----------------------------------------------------------------------------------------------------------------------------------------------------------------|--|
|                                                        | <b>Site Name/Post Office Address</b>                                                                                                | <b>Name and Address of IEC/IRB</b>                                                                                                                              |  |
|                                                        | Allgem. Krankenhaus der Stadt<br>Wien<br>Klinik f. Innere Medizin<br>III/Rheumatologie Wahringergurtel<br>18-20 Vienna 1090 Austria | Ethikkommission der Medizinischen<br>Universität Wien und des Allgemeinen<br>Krankenhauses der Stadt Wien – AKH<br>Borschkegasse 8b/E6 A-1090 Vienna<br>Austria |  |
|                                                        | Arthritis, Rheumatic & Back<br>Disease Associates, PA<br>2309 Evesham Road, Suite 101<br>Voorhees, NJ 08043<br>United States        | Western International Review Board<br>3535 Seventh Avenue SW<br>Olympia, WA 98502<br>United States                                                              |  |
|                                                        | 1144 Sonoma Avenue, Suite 101<br>Santa Rosa, CA 95405 United States                                                                 | Western International Review Board<br>3535 Seventh Avenue SW Olympia, WA<br>98502 United States                                                                 |  |

| <b>List of Investigators and Corresponding IEC/IRB</b> |                                                                                                                           |                                                                                                                                                  |  |
|--------------------------------------------------------|---------------------------------------------------------------------------------------------------------------------------|--------------------------------------------------------------------------------------------------------------------------------------------------|--|
|                                                        | <b>Site Name/Post Office Address</b>                                                                                      | <b>Name and Address of IEC/IRB</b>                                                                                                               |  |
|                                                        | Zentrum fuer Therapiestudien<br>Wilhelm-Leuschner-Platz 12 04107<br>Leipzig Germany                                       | Ethikkommission der Universitaet Leipzig<br>Haertelstr. 16-18 04107 Leipzig Germany                                                              |  |
|                                                        | West Island Rheumatology Research<br>Associates 269 St. Jean Boulevard,<br>Suite #209 Pointe Claire, QC H9R<br>3J1 Canada | Institutional Review Board Services<br>372 Hollandview Trail, Suite 300 Aurora,<br>ON L4G 0A5 Canada                                             |  |
|                                                        | Rheumatology Department St.<br>George Hospital Gray Street<br>Kogarah NSW 2217 Australia                                  | South Eastern Sydney Local Health Network<br>Human Research Ethics Committee St.<br>George Hospital Gray Street Kogarah NSW<br>2217<br>Australia |  |

| <b>List of Investigators and Corresponding IEC/IRB</b> |                                                                                                                   |                                                                                                                                                                                                                                                                                                                                                  |  |
|--------------------------------------------------------|-------------------------------------------------------------------------------------------------------------------|--------------------------------------------------------------------------------------------------------------------------------------------------------------------------------------------------------------------------------------------------------------------------------------------------------------------------------------------------|--|
|                                                        | <b>Site Name/Post Office Address</b>                                                                              | <b>Name and Address of IEC/IRB</b>                                                                                                                                                                                                                                                                                                               |  |
|                                                        | Clinpharm International GmbH & Co. KG<br>Konsulplatz 3 Goerlitz 02826<br>Germany                                  | Local: Ethik - Kommission an der Medizinischen<br>Fakultaet der Universitaet Leipzig<br>Haertelstrasse 16-18 Leipzig 04107 Germany<br><br>Central: Universitaet Erlangen-Nuernberg<br>Ethik-Kommission der Medizinischen<br>Fakultaet der<br>Friedrich-Alexander-Universitaet<br>Erlangen/Nuernberg Krankenhausstr. 12<br>Erlangen 91054 Germany |  |
|                                                        | Rheumatic Disease Center of<br>Montreal 4060 Ste, Catherine St.,<br>West Suite 740 Montreal, QC H3Z<br>2Z3 Canada | Institutional Review Board Services<br>372 Hollandview Trail, Suite 300 Aurora,<br>ON L4G 0A5 Canada                                                                                                                                                                                                                                             |  |

| <b>List of Investigators and Corresponding IEC/IRB</b> |                                                                                                                                                  |                                                                                                                                     |  |
|--------------------------------------------------------|--------------------------------------------------------------------------------------------------------------------------------------------------|-------------------------------------------------------------------------------------------------------------------------------------|--|
|                                                        | <b>Site Name/Post Office Address</b>                                                                                                             | <b>Name and Address of IEC/IRB</b>                                                                                                  |  |
|                                                        | Goatcher Clinical Research Unit<br>Royal Perth Hospital<br>Shenton Park Campus<br>Thorburn House, Selby Street<br>Shenton Park WA 6008 Australia | Royal Perth Hospital Ethics Committee<br>Royal Perth Hospital, Wellington Street<br>Campus<br>GPO Box X2213 Perth WA 6847 Australia |  |

| <b>List of Investigators and Corresponding IEC/IRB</b> |                                                                                                                        |                                                                                                                                              |  |
|--------------------------------------------------------|------------------------------------------------------------------------------------------------------------------------|----------------------------------------------------------------------------------------------------------------------------------------------|--|
|                                                        | <b>Site Name/Post Office Address</b>                                                                                   | <b>Name and Address of IEC/IRB</b>                                                                                                           |  |
|                                                        | Centre Hospitalier Lyon Sud<br>Service de Rhumatologie Pav 2B<br>Chemin du Grand Revoyet Pierre<br>Benite 69310 France | CCPPRB de Paris St Louis - Hopital Saint<br>Louis Porte 5 du Carre historique – 1, avenue<br>Claude Vellefaux 75475 Paris Cedex 10<br>France |  |

| <b>List of Investigators and Corresponding IEC/IRB</b> |                                                                                                                  |                                                                                                            |  |
|--------------------------------------------------------|------------------------------------------------------------------------------------------------------------------|------------------------------------------------------------------------------------------------------------|--|
|                                                        | <b>Site Name/Post Office Address</b>                                                                             | <b>Name and Address of IEC/IRB</b>                                                                         |  |
|                                                        | Hospital Universitario Germans Trias i Pujol Servicio de Reumatologia Crta. Del Canyet s/n Barcelona 08915 Spain | Comite Etico de Investigacion Clinica Hosp. Germans Trias i Pujol Ctra de Canyet s/n Barcelona 08915 Spain |  |
|                                                        | CIADS Research Co., Ltd.<br>1835 Corydon Ave. Winnipeg, MB<br>R3N 0K6 Canada                                     | Institutional Review Board Services<br>372 Hollandview Trail, Suite 300 Aurora,<br>ON L4G 0A5 Canada       |  |

| <b>List of Investigators and Corresponding IEC/IRB</b> |                                                                                                                     |                                                                                                                     |  |
|--------------------------------------------------------|---------------------------------------------------------------------------------------------------------------------|---------------------------------------------------------------------------------------------------------------------|--|
|                                                        | <b>Site Name/Post Office Address</b>                                                                                | <b>Name and Address of IEC/IRB</b>                                                                                  |  |
|                                                        | The Arthritis Program Research Group, Inc. 43 Lundy's Lane Newmarket, ON L3Y 3R7 Canada                             | Institutional Review Board Services<br>372 Hollandview Trail, Suite 300 Aurora ON<br>L4G 0A5 Canada                 |  |
|                                                        | 6640 SW Redwood Lane<br>Suite 301<br>Portland, OR 97224 United States                                               | Western International Review Board<br>3535 Seventh Avenue SW<br>Olympia, WA 98502 United States                     |  |
|                                                        | Universita di Padova<br>Cattedra e Divisione di<br>Reumatologia Policlinico Via<br>Giustiniani 2 35128 Padova Italy | Comitato Etico per la Sperimentazione<br>dell'Azienda Ospedaliera di Padova Via<br>Giustiniani 2 35128 Padova Italy |  |

| <b>List of Investigators and Corresponding IEC/IRB</b> |                                                                                                               |                                                                                                                                          |  |
|--------------------------------------------------------|---------------------------------------------------------------------------------------------------------------|------------------------------------------------------------------------------------------------------------------------------------------|--|
|                                                        | <b>Site Name/Post Office Address</b>                                                                          | <b>Name and Address of IEC/IRB</b>                                                                                                       |  |
|                                                        | Hospital Universitario de Guadalajara Servicio de Reumatologia Donantes de Sangre s/n Guadalajara 19002 Spain | Comite Etico de Investigacion Clinica Hospital Universitario Germans Trias i Pujol Ctra. de Canyet, s/n Badalona - Barcelona 08916 Spain |  |
|                                                        | Arthritis, Osteoporosis & Musculoskeletal Disease Center 280 Pleasant Street Concord, NH 03301 United States  | Concord Hospital Human Investigation Committee Concord Hospital 250 Pleasant Street Concord, NH 03301 United States                      |  |
|                                                        | #307, 4256 Bathurst Street Downsview, ON M3H 5Y8 Canada                                                       | IRB Services 14745-6 Yonge Street, Suite 328 Aurora, ON L4G 6H8 Canada                                                                   |  |
|                                                        | Arthritis Specialist of Western Michigan 1900 Wealthy SE, Suite 220 Grand Rapids, MI 49506 United States      | Western International Review Board 3535 Seventh Avenue SW Olympia, WA 98502 United States                                                |  |

| <b>List of Investigators and Corresponding IEC/IRB</b> |                                                                                                                                                 |                                                                                                                                                |  |
|--------------------------------------------------------|-------------------------------------------------------------------------------------------------------------------------------------------------|------------------------------------------------------------------------------------------------------------------------------------------------|--|
|                                                        | <b>Site Name/Post Office Address</b>                                                                                                            | <b>Name and Address of IEC/IRB</b>                                                                                                             |  |
|                                                        | AO Universitaria Seconda Universita degli Studi di Napoli Cattedra di Reumatologia Policlinico II Via Pansini 5 Naples 80131 Italy              | Comitato Etico dell'Azienda Ospedaliera Universitaria della Seconda Universita degli studi di Napoli Via Costantinopoli 104 80138 Napoli Italy |  |
|                                                        | U.Z. Ghent Universitair Ziekenhuis / University Hospital Afdeling Reumatologie / Department of Rheumatology De Pintelaan 185 Ghent 9000 Belgium | Commissie Medische Ethiek U.Z. Ghent De Pintelaan 185 9000 Gent Belgium                                                                        |  |

| <b>List of Investigators and Corresponding IEC/IRB</b> |                                                                                                        |                                                                                                                                         |  |
|--------------------------------------------------------|--------------------------------------------------------------------------------------------------------|-----------------------------------------------------------------------------------------------------------------------------------------|--|
|                                                        | <b>Site Name/Post Office Address</b>                                                                   | <b>Name and Address of IEC/IRB</b>                                                                                                      |  |
|                                                        | Academic Hospital Maastricht Dept. of Rheumatology P. Debeyelaan 25 6229 HX Maastricht The Netherlands | CWOM Academic Hospital Nijmegen Gerard van Swietenlaan 2 Nijmegen The Netherlands 6500 HB Nijmegen The Netherlands                      |  |
|                                                        | Academic Hospital Groningen Dept. of Rheumatology Hanzeplein 1 9713 GZ Groningen The Netherlands       | Commissie Mensgebonden Onderzoek Regio Arnhem-Nijmegen UMC St Radboud Geert Grootplein 10 Postbus 9101 6500 NB Nijmegen The Netherlands |  |

| <b>List of Investigators and Corresponding IEC/IRB</b> |                                                                                                                          |                                                                                                                                         |  |
|--------------------------------------------------------|--------------------------------------------------------------------------------------------------------------------------|-----------------------------------------------------------------------------------------------------------------------------------------|--|
|                                                        | <b>Site Name/Post Office Address</b>                                                                                     | <b>Name and Address of IEC/IRB</b>                                                                                                      |  |
|                                                        | Universitair Medisch Centrum (UMC) St Radboud Afdeling Reumatologie Geert Grootplein 8 6525 GA Nijmegen, The Netherlands | Commissie Mensgebonden Onderzoek Regio Arnhem-Nijmegen UMC St Radboud Geert Grootplein 10 Postbus 9101 6500 NB Nijmegen The Netherlands |  |
|                                                        | Academic Hospital Groningen Dept. of Rheumatology Hanzeplein 1 9713 GZ Groningen The Netherlands                         | CWOM Academic Hospital Nijmegen Gerard van Swietenlaan 2 Nijmegen The Netherlands                                                       |  |
|                                                        | Karolinska Hospital Dept. of Rheumatology 171 76 Stockholm Sweden                                                        | Karolinska Institute's Regional Research Ethics Committee Nobels väg 5 171 76 Stockholm Sweden                                          |  |

| <b>List of Investigators and Corresponding IEC/IRB</b> |                                                                                                                                                             |                                                                                                                                         |  |
|--------------------------------------------------------|-------------------------------------------------------------------------------------------------------------------------------------------------------------|-----------------------------------------------------------------------------------------------------------------------------------------|--|
|                                                        | <b>Site Name/Post Office Address</b>                                                                                                                        | <b>Name and Address of IEC/IRB</b>                                                                                                      |  |
|                                                        | Rheumatology Department<br>5 <sup>th</sup> Floor, Building 1 Princess<br>Alexandra Hospital Ipswich Road<br>Woolloongabba QLD 4102 Australia                | Human Research Ethics Committee<br>Level 2, Building 35 Princess Alexandra<br>Hospital Ipswich Road Woolloongabba QLD<br>4102 Australia |  |
|                                                        | UZ VUB Universitair Ziekenhuis<br>Vrije Universiteit Brussels<br>Rheumatology Unit Laarbeeklaan<br>101 Brussels 1090 Belgium                                | Commissie Medische Ethiek<br>UZ Brussels Faculteit Geneeskunde en<br>Farmacie Laarbeeklaan 101 Brussels 1090<br>Belgium                 |  |
|                                                        | U.Z. Ghent Universitair Ziekenhuis /<br>University Hospital Afdeling<br>Reumatologie / Department of<br>Rheumatology De Pintelaan 185<br>Ghent 9000 Belgium | Ethics Committee University Hospital De<br>Pintelaan 185 9000 Gent Belgium                                                              |  |

| <b>List of Investigators and Corresponding IEC/IRB</b> |                                                                                                                        |                                                                                                                                                   |  |
|--------------------------------------------------------|------------------------------------------------------------------------------------------------------------------------|---------------------------------------------------------------------------------------------------------------------------------------------------|--|
|                                                        | <b>Site Name/Post Office Address</b>                                                                                   | <b>Name and Address of IEC/IRB</b>                                                                                                                |  |
|                                                        | Hospital Universitario de<br>Guadalajara Servicio de<br>Reumatologia Donantes de Sangre<br>s/n Guadalajara 19002 Spain | Hospital Universitario Germans Trias i Pujol<br>Comite Etico de Investigacion Clinica Ctra.<br>de Canyet, s/n Badalona - Barcelona 08915<br>Spain |  |
|                                                        | Consulmed GbR<br>Konsulplatz 3<br>02826 Goerlitz Germany                                                               | Ethikkommission der Universitaet Leipzig<br>Haertelstrasse 16-18<br>04107 Leipzig Germany                                                         |  |
|                                                        | Musculoskeletal Unit<br>Freeman Hospital Newcastle – upon<br>Tyne NE7 7DN Great Britain                                | Prof. Heasman<br>Joint Ethics Committee Newcastle & North<br>Tynesise Health Authority Benfield Road<br>Newcastle NE6 4PF Great Britain           |  |

| <b>List of Investigators and Corresponding IEC/IRB</b> |                                                                                                             |                                                                                                                                                                                                                                                                                                                  |  |
|--------------------------------------------------------|-------------------------------------------------------------------------------------------------------------|------------------------------------------------------------------------------------------------------------------------------------------------------------------------------------------------------------------------------------------------------------------------------------------------------------------|--|
|                                                        | <b>Site Name/Post Office Address</b>                                                                        | <b>Name and Address of IEC/IRB</b>                                                                                                                                                                                                                                                                               |  |
|                                                        | Evangelisches Fachkrankenhaus<br>Studienambulanz Dr. Wassenberg<br>Rosenstrasse 2 Ratingen 40882<br>Germany | Local: Ethik-Kommission der<br>Aerztekammer Nordrhein<br>Tersteegenstrasse 9 Duesseldorf 40474<br>Germany Central: Universitaet<br>Erlangen-Nuernberg Ethik-Kommission der<br>Medizinischen Fakultaet der<br>Friedrich-Alexander-Universitaet<br>Erlangen/Nuernberg Krankenhausstr. 12<br>Erlangen 91054 Germany |  |
|                                                        | Arthritis Center of Nebraska 2121<br>South 56th Street Lincoln NE 68506<br>United States                    | Western International Review Board 3535<br>Seventh Avenue SW Olympia, WA 98502<br>United States                                                                                                                                                                                                                  |  |

| <b>List of Investigators and Corresponding IEC/IRB</b> |                                                                                                                   |                                                                                                                  |  |
|--------------------------------------------------------|-------------------------------------------------------------------------------------------------------------------|------------------------------------------------------------------------------------------------------------------|--|
|                                                        | <b>Site Name/Post Office Address</b>                                                                              | <b>Name and Address of IEC/IRB</b>                                                                               |  |
|                                                        | 8700 Beverly Blvd., Suite B-131 Los<br>Angeles, CA 90048 United States                                            | Cedars-Sinai Medical Center IRB 8383<br>Wilshire Blvd. Los Angeles, CA 90048<br>United States                    |  |
|                                                        | Houston Institute for Clinical<br>Research 7777 Southwest Freeway<br>Suite 720 Houston, TX 77074 United<br>States | Western International Review Board 3535<br>Seventh Avenue SW Olympia, WA 98502<br>United States                  |  |
|                                                        | UZ Gasthuisberg Herestraat 49 3000<br>Leuven Belgium                                                              | Etische Commissie Klinische Studies<br>Universitair Ziekenhuis Gasthuisberg<br>Herestraat 49 3000 Leuven Belgium |  |

| <b>List of Investigators and Corresponding IEC/IRB</b> |                                                                                                           |                                                                                                 |  |
|--------------------------------------------------------|-----------------------------------------------------------------------------------------------------------|-------------------------------------------------------------------------------------------------|--|
|                                                        | <b>Site Name/Post Office Address</b>                                                                      | <b>Name and Address of IEC/IRB</b>                                                              |  |
|                                                        | Department of Rheumatology<br>Hereford County Hospital Hereford<br>HR1 2ER UK                             | Herefordshire Districe Ethics Committee<br>Victoria House Eign Street Hereford HR4<br>0AN UK    |  |
|                                                        | STAT Research, Inc. One Elizabeth<br>Place West Medical Plaza Suite 230<br>Dayton, OH 45417 United States | Western International Review Board 3535<br>Seventh Avenue SW Olympia, WA 98502<br>United States |  |

| <b>List of Investigators and Corresponding IEC/IRB</b> |                                                                                                                                 |                                                                                                 |  |
|--------------------------------------------------------|---------------------------------------------------------------------------------------------------------------------------------|-------------------------------------------------------------------------------------------------|--|
|                                                        | <b>Site Name/Post Office Address</b>                                                                                            | <b>Name and Address of IEC/IRB</b>                                                              |  |
|                                                        | Chesapeake Medical Research<br>5601 Loch Raven Blvd. Russell<br>Morgan Bldg., Suite 510<br>Baltimore, MD 21239 United<br>States | Western International Review Board<br>3535 Seventh Avenue SW Olympia, WA<br>98502 United States |  |
